# Supplementary material for: Changing the calcination temperature to tune the microstructure and polishing properties of ceria octahedrons
Source: Royal Society of Chemistry journal article supplement (doi:10.1039/d2ra02367a), 2022-01-01
Supplement: d2ra02367a1.pdf [file d2ra02367a1.pdf]

### Supplementary Information

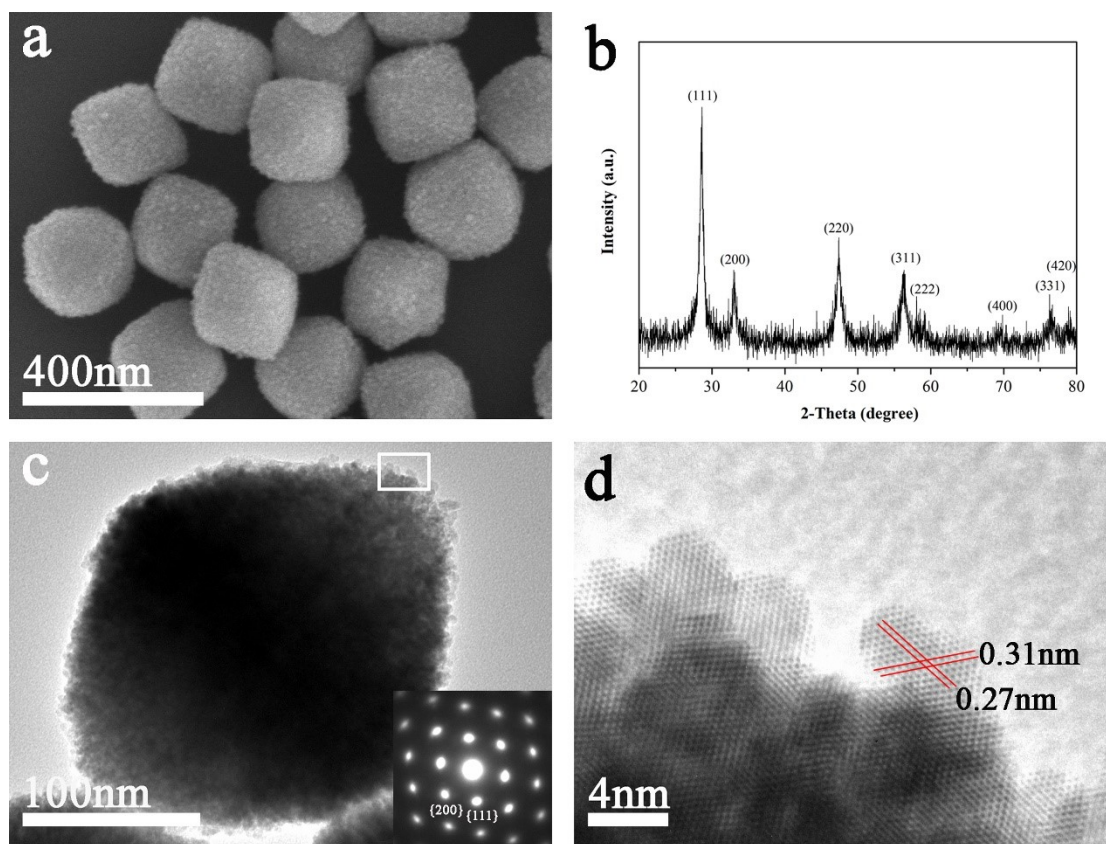

**Fig. S1** Typical SEM image (a) and XRD pattern (b) of the hierarchical octahedral  $\text{CeO}_2$  precursor synthesized by a hydrothermal method. (c) TEM image of a single precursor particle and corresponding SAED pattern (inset). (d) HRTEM image recorded from white-boxed region marked in c.

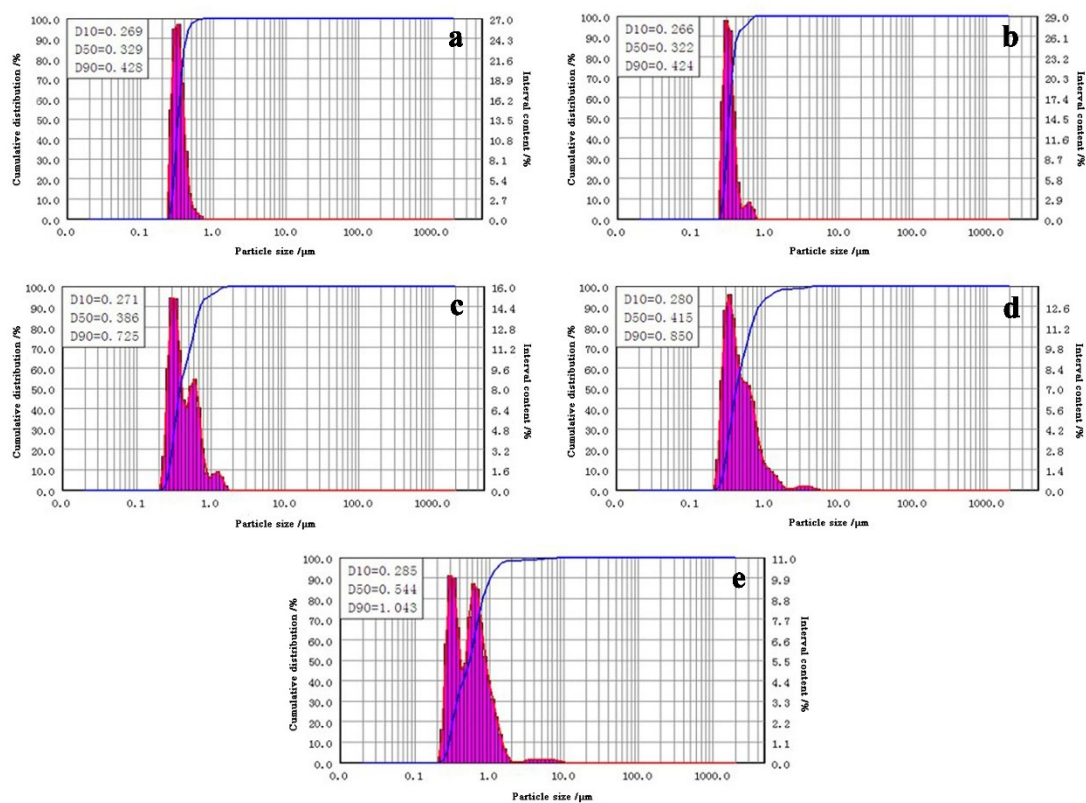

Fig. S2 The particle size distribution curves of calcined products Sample A-E (a-e).

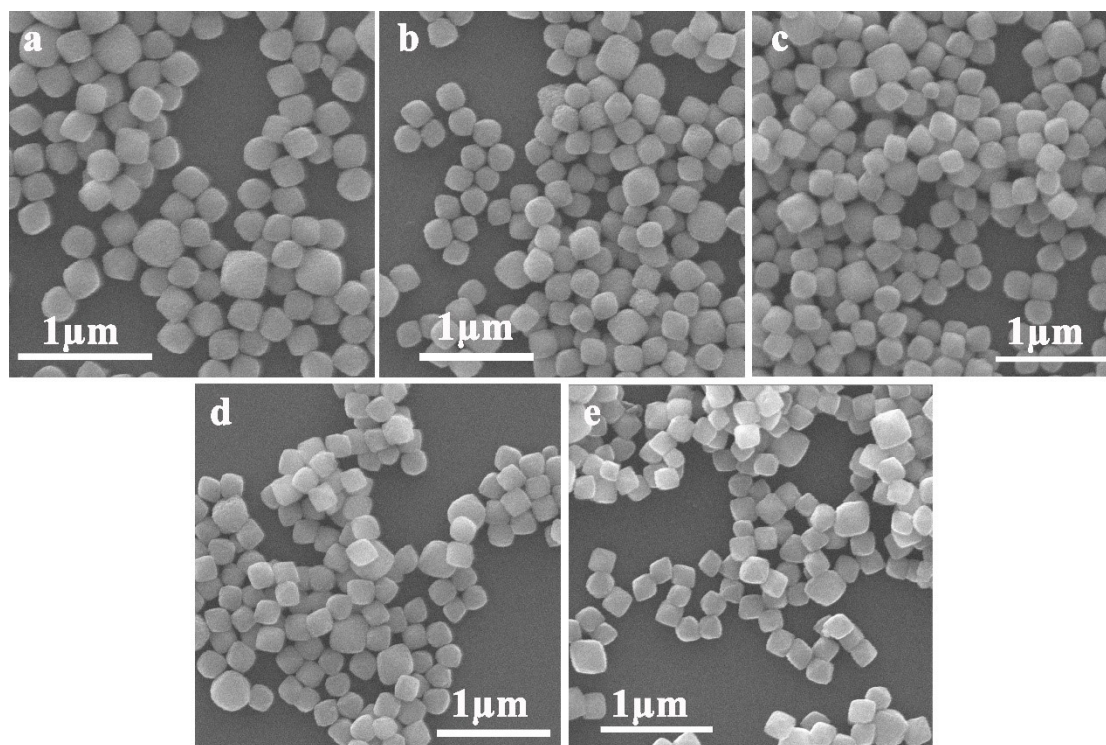

Fig. S3 Low-magnification SEM images of the calcined products Sample A-E (a-e).

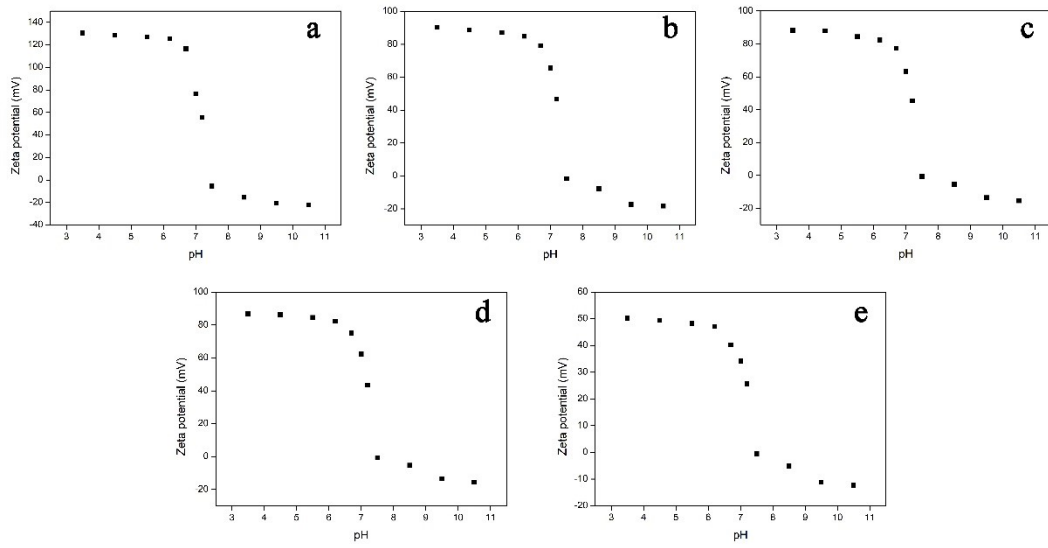

**Fig. S4** Zeta potential vs pH curves of the calcined products Sample A-E (a-e).

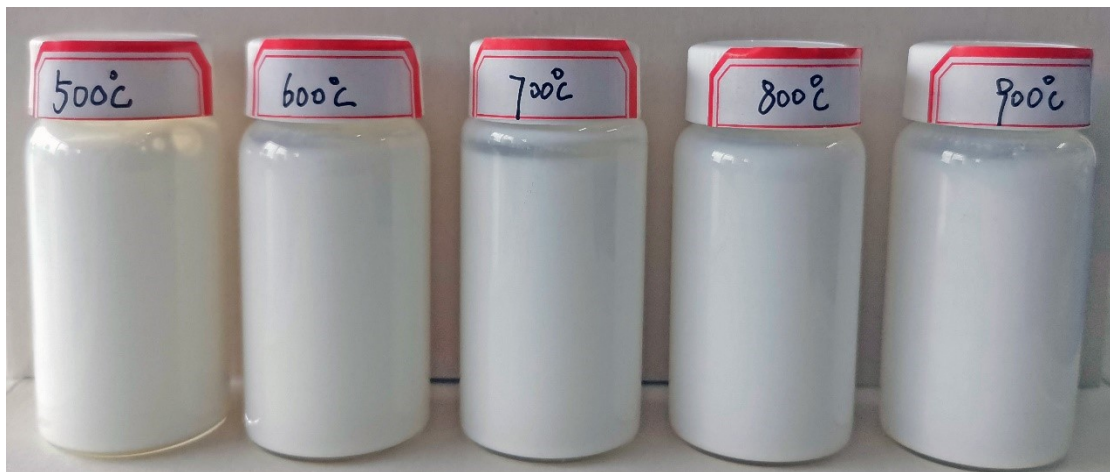

**Fig. S5** Digital photo of polishing slurries prepared with the products calcined at 500, 600, 700, 800 and 900 °C (Sample A-E).
